# Supplementary material for: Optimization of Sample Preparation for Metabolomics Exploration of Urine, Feces, Blood and Saliva in Humans Using Combined NMR and UHPLC-HRMS Platforms
Source: MDPI journal article supplement (doi:10.3390/molecules26144111), 2021-07-06
Supplement: s1 [file s1]

# SUPPLEMENTARY DATA

Optimization of sample preparation for metabolomics exploration of urine, feces, blood and saliva in human using combined NMR and UHPLC-HRMS platforms

*Cécile Martias<sup>1</sup>, Nadine Baroukh<sup>1</sup>, Sylvie Mavel<sup>1</sup>, Hélène Blasco<sup>1,3</sup>, Antoine Lefevre<sup>1</sup>, Lea Roch<sup>2</sup>, Frédéric Montigny<sup>1</sup>, Julie Gatien<sup>2</sup>, Laurent Schibler<sup>2</sup>, Diane Dufour<sup>1,3</sup>, Lydie Nadal-Desbarats<sup>1</sup>, Patrick Emond<sup>1,3</sup>.*

1 - UMR 1253, iBrain, University of Tours, Inserm, Tours, France

2 – ALLICE, Phenotyping station, Nouzilly, France

3- CHRU Tours, Medical biology center, Tours, France.

# URINE

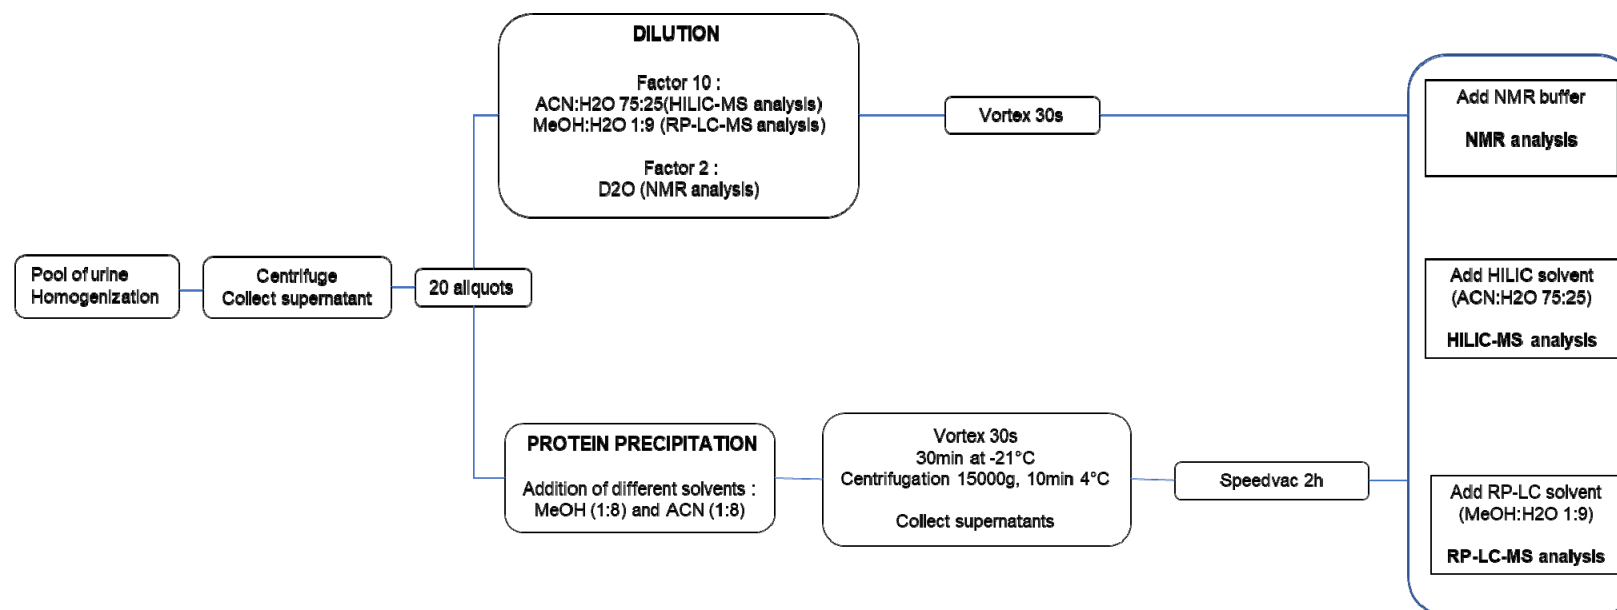

Figure S1: Schematic presentation of the preparation procedures applied on the pool of urine for the selection of the optimum protocol for the maximum metabolome coverage by LC-MS and <sup>1</sup>H-NMR.

|                                          | Numbers of buckets |           |           |           |     | CV – standard deviation |
|------------------------------------------|--------------------|-----------|-----------|-----------|-----|-------------------------|
|                                          | RP-LC POS          | RP-LC NEG | HILIC POS | HILIC NEG | NMR |                         |
| Urine :ACN (1 :8)<br>(n=5)               | 1976               | 1053      | 981       | 612       | 44  | 11% - 7%                |
| Urine :MeOH (1 :8)<br>(n=5)              | 2335               | 1533      | 1030      | 830       | 45  | 9% - 6%                 |
| Urine :H <sub>2</sub> O (1 :10)<br>(n=5) | 2358               | 1532      | 1571      | 1052      |     | 9% - 6%                 |
| Urine :H <sub>2</sub> O (1 :2)<br>(n=5)  |                    |           |           |           | 46  |                         |

Table S1: Number of extracted buckets in urine for the different extraction methods in <sup>1</sup>H-NMR and UHPLC-MS

|                                          |                       | RP-LC         | HILIC        | NMR         | TOTAL         |
|------------------------------------------|-----------------------|---------------|--------------|-------------|---------------|
| Urine :ACN (1 :8)<br>(n=5)               | Number of metabolites | 192           | 104          | 37          | 176           |
|                                          | CV<5%                 | 18            | 0            | 9           | 27            |
|                                          | CV<10%                | 41            | 20           | 35          | 88            |
|                                          | CV<20%                | 64            | 59           | 36          | 132           |
|                                          | <b>CV&lt;30%</b>      | <b>72</b>     | <b>81</b>    | <b>36</b>   | <b>145</b>    |
|                                          | CV % mean (min-max)   | 20% (1%-158%) | 20% (5%-59%) | 7% (2%-44%) | 17% (1%-158%) |
| Urine :MeOH (1 :8)<br>(n=5)              | Number of metabolites | 107           | 134          | 37          | 215           |
|                                          | CV<5%                 | 41            | 1            | 23          | 64            |
|                                          | CV<10%                | 83            | 16           | 36          | 125           |
|                                          | CV<20%                | 98            | 72           | 36          | 172           |
|                                          | <b>CV&lt;30%</b>      | <b>102</b>    | <b>114</b>   | <b>36</b>   | <b>201</b>    |
|                                          | CV % mean (min-max)   | 8% (1%-76%)   | 20% (4%-51%) | 5% (4%-9%)  | 12% (1%-76%)  |
| Urine :H <sub>2</sub> O (1 :10)<br>(n=5) | Number of metabolites | 112           | 119          |             | 205           |
|                                          | CV<5%                 | 47            | 7            |             | 82            |
|                                          | CV<10%                | 87            | 47           |             | 144           |
|                                          | CV<20%                | 99            | 99           |             | 186           |
|                                          | <b>CV&lt;30%</b>      | <b>105</b>    | <b>112</b>   |             | <b>197</b>    |
|                                          | CV % mean (min-max)   | 9% (0%-77%)   | 14% (2%-84%) |             |               |
| Urine :H <sub>2</sub> O (1 :2)<br>(n=5)  | Number of metabolites |               |              | 37          |               |
|                                          | CV<5%                 |               |              | 32          |               |
|                                          | CV<10%                |               |              | 35          |               |
|                                          | CV<20%                |               |              | 37          |               |
|                                          | <b>CV&lt;30%</b>      |               |              | <b>37</b>   |               |
|                                          | CV % mean (min-max)   |               |              | 4% (2%-14%) | 9% (0%-77%)   |

Table S2: Number of extracted metabolites and coefficient of validation in urine for the different extraction methods in <sup>1</sup>H-NMR and UHPLC-MS

| Pathway name                                        | Urine:ACN (1:8) |                      | Urine:MeOH (1:8) |                      | Urine:H <sub>2</sub> O |                      |
|-----------------------------------------------------|-----------------|----------------------|------------------|----------------------|------------------------|----------------------|
|                                                     | Hits            | <i>p-value</i>       | Hits             | <i>p-value</i>       | Hits                   | <i>p-value</i>       |
| Glyoxylate and dicarboxylate metabolism             | 7               | 1.86 E <sup>-3</sup> | 12               | 1.37 E <sup>-6</sup> | 9                      | 4.17 E <sup>-4</sup> |
| Phenylalanine metabolism                            | 6               | 7.16 E <sup>-6</sup> | 6                | 3.58 E <sup>-5</sup> | 6                      | 3.58 E <sup>-5</sup> |
| Glycine, serine and threonine metabolism            | 7               | 1.52 E <sup>-3</sup> | 9                | 3.17 E <sup>-4</sup> | 8                      | 1.65 E <sup>-3</sup> |
| Citrate cycle                                       | 4               | 1.31 E <sup>-2</sup> | 6                | 9.16 E <sup>-4</sup> | 6                      | 9.16 E <sup>-4</sup> |
| Alanine, aspartate and glutamate metabolism         | /               | /                    | 8                | 1.00 E <sup>-3</sup> | /                      | /                    |
| Purine metabolism                                   | /               | /                    | 13               | 1.2 E <sup>-3</sup>  | 11                     | 1.1 E <sup>-2</sup>  |
| Phenylalanine, tyrosine and tryptophan biosynthesis | 2               | 2.01 E <sup>-2</sup> | 3                | 1.85 E <sup>-3</sup> | 3                      | 1.85 E <sup>-3</sup> |
| Glycerophospholipid metabolism                      | /               | /                    | 5                | 2.23 E <sup>-3</sup> | /                      | /                    |
| Tryptophan metabolism                               | 9               | 5.05 E <sup>-4</sup> | 9                | 3.68 E <sup>-3</sup> | 8                      | 1.28 E <sup>-2</sup> |
| beta-Alanine metabolism                             | /               | /                    | 6                | 4.46 E <sup>-3</sup> | 7                      | 7.6 E <sup>-4</sup>  |
| Pantothenate and CoA biosynthesis                   | /               | /                    | 5                | 8.3 E <sup>-3</sup>  | /                      | /                    |
| Pyrimidine metabolism                               | /               | /                    | 8                | 9.46E <sup>-3</sup>  | /                      | /                    |
| Histidine metabolism                                | /               | /                    | /                | /                    | 5                      | 6.25 E <sup>-3</sup> |
| Tyrosine metabolism                                 | 8               | 2.81 E <sup>-3</sup> | /                | /                    | /                      | /                    |
| Sphingolipid metabolism                             | 3               | 1.38 E <sup>-2</sup> | /                | /                    | /                      | /                    |
| Synthesis and degradation of ketone bodies          | 2               | 3.22 E <sup>-2</sup> | /                | /                    | /                      | /                    |
|                                                     | TOTAL           | 9 pathways           | 12 pathways      |                      | 9 pathways             |                      |

Table S3: Metabolite set coverage highlighted by metabolites extracted (CV<30%) according to the three sample preparations. The number of hits and the p-values are shown for each preparation by metabolite sets.

# BLOOD

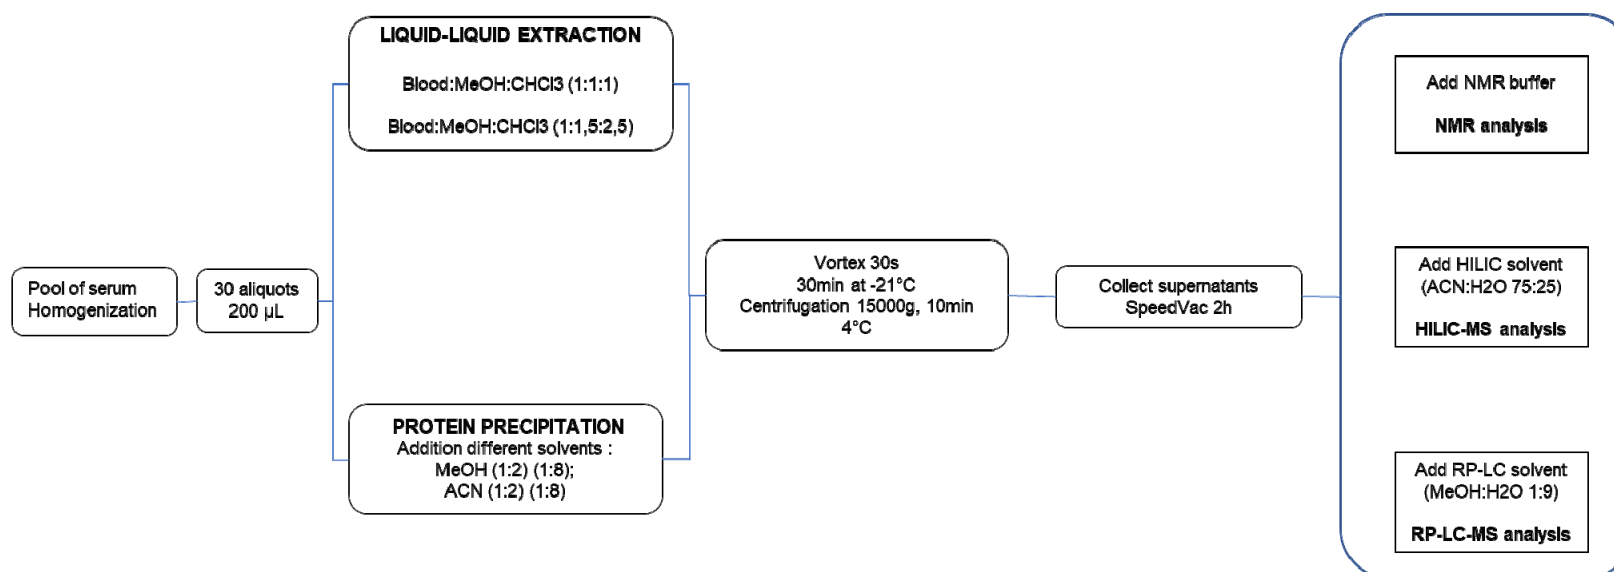

Figure S2: Schematic presentation of the preparation procedures applied on the pool of sera for the selection of the optimum protocol for the maximum metabolome coverage by UHPLC-MS and <sup>1</sup>H-NMR.

|                                                       | Numbers of buckets |           |           |           |     | CV – standard deviation |
|-------------------------------------------------------|--------------------|-----------|-----------|-----------|-----|-------------------------|
|                                                       | RP-LC POS          | RP-LC NEG | HILIC POS | HILIC NEG | NMR |                         |
| Blood :ACN ( 1 :2)<br>(n=5)                           | 1233               | 1137      | 1624      | 2345      | 42  | 11% - 6%                |
| Blood :ACN (1 :8)<br>(n=5)                            | 1173               | 997       | 1907      | 2373      | 37  | 13% - 6%                |
| Blood :MeOH (1 :2)<br>(n=5)                           | 1285               | 1171      | 2018      | 2189      | 35  | 14% - 6%                |
| Blood :MeOH (1 :8)<br>(n=5)                           | 1363               | 1167      | 2266      | 1908      | 42  | 13% - 5%                |
| Blood: MeOH:CHCl <sub>3</sub><br>(1:1:1)<br>(n=5)     | 996                | 1016      | 1049      | 1441      | 43  | 11% - 6%                |
| Blood: MeOH:CHCl <sub>3</sub><br>(1:1.5:2.5)<br>(n=5) | 991                | 1020      | 1065      | 2019      | 42  | 14% - 6%                |

Table S4: Number of extracted buckets in blood for the different extraction methods in <sup>1</sup>H-NMR and UHPLC-MS

|                                                    |                       | RP-LC        | HILIC         | NMR          | Total         |
|----------------------------------------------------|-----------------------|--------------|---------------|--------------|---------------|
| Blood :ACN ( 1 :2)<br>(n=5)                        | Number of metabolites | 75           | 80            | 22           | 139           |
|                                                    | CV<5%                 | 45           | 3             | 4            | 51            |
|                                                    | CV<10%                | 66           | 35            | 17           | 96            |
|                                                    | CV<20%                | 71           | 66            | 19           | 122           |
|                                                    | <b>CV&lt;30%</b>      | <b>72</b>    | <b>74</b>     | <b>20</b>    | <b>129</b>    |
|                                                    | CV % mean (min-max)   | 6% (1%-42%)  | 13%(4%-44%)   | 11% (4%-76%) | 10% (1%-76%)  |
| Blood :ACN (1 :8)<br>(n=5)                         | Number of metabolites | 66           | 82            | 22           | 135           |
|                                                    | CV<5%                 | 9            | 6             | 0            | 15            |
|                                                    | CV<10%                | 24           | 36            | 4            | 58            |
|                                                    | CV<20%                | 59           | 59            | 10           | 105           |
|                                                    | <b>CV&lt;30%</b>      | <b>62</b>    | <b>74</b>     | <b>19</b>    | <b>123</b>    |
|                                                    | CV % mean (min-max)   | 12% (1%-39%) | 15% (2%-74%)  | 20% (7%-37%) | 14% (1%-74%)  |
| Blood :MeOH (1 :2)<br>(n=5)                        | Number of metabolites | 76           | 88            | 22           | 147           |
|                                                    | CV<5%                 | 7            | 4             | 0            | 11            |
|                                                    | CV<10%                | 50           | 28            | 4            | 75            |
|                                                    | CV<20%                | 74           | 67            | 19           | 132           |
|                                                    | <b>CV&lt;30%</b>      | <b>76</b>    | <b>80</b>     | <b>21</b>    | <b>141</b>    |
|                                                    | CV % mean (min-max)   | 9% (1%-29%)  | 16% (3%-77%)  | 14% (9%-40%) | 12% (1%-77%)  |
| Blood :MeOH (1 :8)<br>(n=5)                        | Number of metabolites | 89           | 88            | 22           | 157           |
|                                                    | CV<5%                 | 50           | 2             | 12           | 62            |
|                                                    | CV<10%                | 73           | 36            | 19           | 107           |
|                                                    | CV<20%                | 81           | 55            | 21           | 128           |
|                                                    | <b>CV&lt;30%</b>      | <b>84</b>    | <b>73</b>     | <b>21</b>    | <b>143</b>    |
|                                                    | CV % mean (min-max)   | 7% (1%-60%)  | 19% (3%-123%) | 6% (1%-33%)  | 11% (1%-72%)  |
| Blood: MeOH:CHCl <sub>3</sub> (1:1:1)<br>(n=5)     | Number of metabolites | 63           | 74            | 21           | 127           |
|                                                    | CV<5%                 | 9            | 5             | 16           | 30            |
|                                                    | CV<10%                | 53           | 18            | 20           | 81            |
|                                                    | CV<20%                | 62           | 52            | 20           | 112           |
|                                                    | <b>CV&lt;30%</b>      | <b>63</b>    | <b>61</b>     | <b>21</b>    | <b>119</b>    |
|                                                    | CV % mean (min-max)   | 7% (1%-21%)  | 21% (1%-109%) | 5% (2%-28%)  | 12% (1%-109%) |
| Blood: MeOH:CHCl <sub>3</sub> (1:1.5:2.5)<br>(n=5) | Number of metabolites | 60           | 76            | 22           | 126           |
|                                                    | CV<5%                 | 22           | 3             | 14           | 37            |
|                                                    | CV<10%                | 54           | 26            | 18           | 88            |
|                                                    | CV<20%                | 58           | 52            | 18           | 108           |
|                                                    | <b>CV&lt;30%</b>      | <b>60</b>    | <b>65</b>     | <b>20</b>    | <b>118</b>    |
|                                                    | CV % mean (min-max)   | 6% (1%-28%)  | 17% (2%-56%)  | 10% (2%-75%) | 11% (1%-75%)  |

Table S5: Number of extracted metabolites and coefficient of validation in blood for the different extraction methods in <sup>1</sup>H-NMR and UHPLC-MS



| Pathway name                                         | ACN 1:2    |                      | ACN 1:8    |                      | MeOH 1:2   |                      | MeOH 1:8   |                      | Blood: MeOH:CHCl3 1:1:1 |                      | Blood: MeOH:CHCl3 1:1.5:2.5 |                      |
|------------------------------------------------------|------------|----------------------|------------|----------------------|------------|----------------------|------------|----------------------|-------------------------|----------------------|-----------------------------|----------------------|
|                                                      | Hits       | <i>p</i> -value      | Hits                    | <i>p</i> -value      | Hits                        | <i>p</i> -value      |
| Tryptophan metabolism                                | 9          | 4.15 E <sup>-4</sup> | 9          | 1.99 E <sup>-4</sup> | 9          | 5.55 E <sup>-4</sup> | 9          | 4.58 E <sup>-4</sup> | /                       | /                    | /                           | /                    |
| Phenylalanine, tyrosine and tryptophane biosynthesis | 3          | 7.63 E <sup>-4</sup> | 3          | 5.76 E <sup>-4</sup> | 3          | 8.55 E <sup>-4</sup> | 3          | 7.93 E <sup>-4</sup> | 3                       | 5.52 E <sup>-4</sup> | 3                           | 5.52 E <sup>-4</sup> |
| Phenylalanine metabolism                             | 4          | 1.81 E <sup>-3</sup> | 4          | 1.27 E <sup>-3</sup> | 4          | 2.09 E <sup>-3</sup> | 4          | 1.19 E <sup>-3</sup> | 3                       | 1.31 E <sup>-2</sup> | 3                           | 1.31 E <sup>-2</sup> |
| Pantothenate and CoA biosynthesis                    | 5          | 2.25 E <sup>-3</sup> | 4          | 1.08 E <sup>-2</sup> | /          | /                    | 5          | 2.38 E <sup>-3</sup> | 4                       | 1.02 E <sup>-2</sup> | 5                           | 1.37 E <sup>-3</sup> |
| Tyrosine metabolism                                  | /          | /                    | /          | /                    | /          | /                    | 8          | 2.59 E <sup>-3</sup> | /                       | /                    | /                           | /                    |
| Valine, leucine and isoleucine metabolism            | 3          | 8.98 E <sup>-3</sup> | 3          | 6.89 E <sup>-3</sup> | 3          | 9.99 E <sup>-3</sup> | 3          | 9.31 E <sup>-3</sup> | 3                       | 6.62 E <sup>-3</sup> | 3                           | 6.62 E <sup>-3</sup> |
| Purine metabolism                                    | /          | /                    | 8          | 2.00 E <sup>-2</sup> | 9          | 1.50 E <sup>-2</sup> | 9          | 1.28 E <sup>-2</sup> | 9                       | 5.77 E <sup>-3</sup> | 9                           | 5.77 E <sup>-3</sup> |
| Ubiquinone and other terpenoid-quinone biosynthesis  | /          | /                    | /          | /                    | /          | /                    | 3          | 1.34 E <sup>-2</sup> | /                       | /                    | /                           | /                    |
| Pyrimidine metabolism                                | /          | /                    | /          | /                    | /          | /                    | 6          | 2.54 E <sup>-2</sup> | /                       | /                    | /                           | /                    |
| Glycine, serine and threonine metabolism             | 7          | 1.30 E <sup>-3</sup> | /          | /                    | 7          | 1.63 E <sup>-3</sup> | /          | /                    | 6                       | 3.88 E <sup>-3</sup> | 7                           | 6.71 E <sup>-4</sup> |
| Glycerophospholipid metabolism                       | /          | /                    | 4          | 2.90 E <sup>-2</sup> | 4          | 6.17 E <sup>-3</sup> | /          | /                    | 4                       | 3.62 E <sup>-3</sup> | /                           | /                    |
| Glyoxylate and dicarboxylate metabolism              | 6          | 7.90 E <sup>-3</sup> | /          | /                    | 4          | 9.50 E <sup>-3</sup> | /          | /                    | 7                       | 8.30 E <sup>-4</sup> | 6                           | 4.61 E <sup>-3</sup> |
| Sphingolipid metabolism                              | 3          | 1.29 E <sup>-2</sup> | /          | /                    | 3          | 1.43 E <sup>-2</sup> | /          | /                    | /                       | /                    | /                           | /                    |
| Alanine, aspartate and glutamate metabolism          | 5          | 2.13 E <sup>-2</sup> | /          | /                    | /          | /                    | /          | /                    | /                       | /                    | /                           | /                    |
| Pyruvate metabolism                                  | /          | /                    | 4          | 1.62 E <sup>-2</sup> | /          | /                    | /          | /                    | /                       | /                    | 4                           | 1.54 E <sup>-2</sup> |
| Synthesis and degradation of ketone bodies           | /          | /                    | 2          | 2.57 E <sup>-2</sup> | /          | /                    | /          | /                    | /                       | /                    | /                           | /                    |
| Citrate cycle                                        | /          | /                    | /          | /                    | /          | /                    | /          | /                    | 4                       | 8.16 E <sup>-3</sup> | /                           | /                    |
| Biotin metabolism                                    | /          | /                    | /          | /                    | /          | /                    | /          | /                    | /                       | /                    | 2                           | 1.55 E <sup>-2</sup> |
| TOTAL                                                | 9 pathways |                      | 9 pathways |                      | 9 pathways |                      | 9 pathways |                      | 9 pathways              |                      | 9 pathways                  |                      |

Table S6: Metabolite set coverage highlighted by metabolites extracted in blood (CV<30%) according to the six sample preparations. The number of hits and the p-values are shown for each preparation by metabolite sets.

# SALIVA

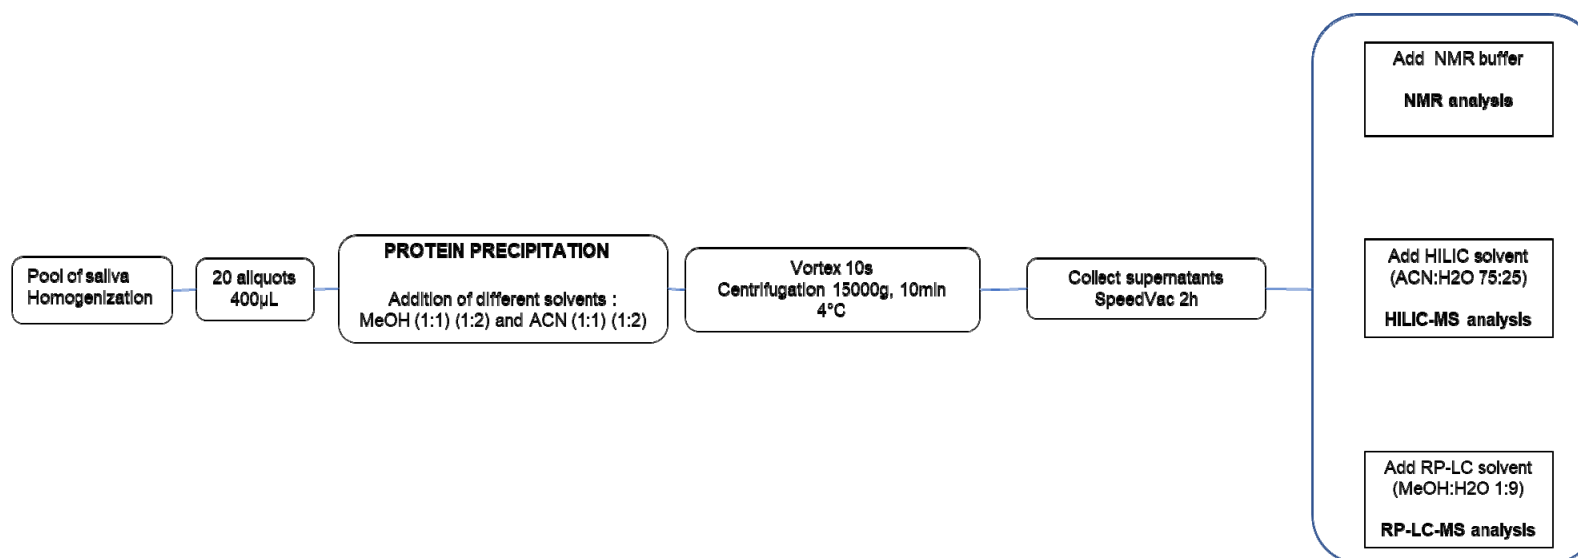

Figure S3: Schematic presentation of the sample preparation procedure applied on the pool of saliva for the selection of the optimum protocol for the maximum metabolome coverage by UPHLC-MS and  $^1\text{H}$ -NMR

|                                 | Numbers of buckets |           |           |           |     | CV – standard deviation |
|---------------------------------|--------------------|-----------|-----------|-----------|-----|-------------------------|
|                                 | RP-LC POS          | RP-LC NEG | HILIC POS | HILIC NEG | NMR |                         |
| Saliva :ACN<br>(1 :2)<br>(n=5)  | 987                | 520       | 1575      | 679       | 43  | 16% - 6%                |
| Saliva :ACN<br>(1 :1)<br>(n=5)  | 988                | 684       | 1506      | 684       | 44  | 17% - 6%                |
| Saliva :MeOH<br>(1 :2)<br>(n=5) | 941                | 531       | 1233      | 725       | 47  | 19% - 6%                |
| Saliva :MeOH<br>(1 :1)<br>(n=5) | 987                | 407       | 1240      | 736       | 43  | 19% - 5%                |

Table S7: Number of extracted buckets in saliva for the different extraction methods in <sup>1</sup>H-NMR and UHPLC-MS

|                              |                       | RP-LC         | HILIC        | NMR           | Total        |
|------------------------------|-----------------------|---------------|--------------|---------------|--------------|
| Saliva :ACN (1 :2)<br>(n=5)  | Number of metabolites | 53            | 108          | 18            | 147          |
|                              | CV<5%                 | 11            | 4            | 0             | 15           |
|                              | CV<10%                | 38            | 43           | 9             | 77           |
|                              | CV<20%                | 46            | 80           | 15            | 120          |
|                              | CV<30%                | 50            | 96           | 16            | 136          |
|                              | CV % mean (min-max)   | 11% (2%- 71%) | 17% (3%-75%) | 16% (8%-90%)  | 13% (2%-62%) |
| Saliva :ACN (1 :1)<br>(n=5)  | Number of metabolites | 57            | 110          | 18            | 148          |
|                              | CV<5%                 | 18            | 3            | 7             | 28           |
|                              | CV<10%                | 41            | 22           | 13            | 67           |
|                              | CV<20%                | 50            | 63           | 15            | 110          |
|                              | CV<30%                | 53            | 98           | 16            | 137          |
|                              | CV % mean (min-max)   | 11% (1%- 78%) | 20% (1%-80%) | 11% (3%-54%)  | 14% (1%-80%) |
| Saliva :MeOH (1 :2)<br>(n=5) | Number of metabolites | 53            | 109          | 18            | 146          |
|                              | CV<5%                 | 13            | 5            | 2             | 20           |
|                              | CV<10%                | 36            | 16           | 14            | 61           |
|                              | CV<20%                | 46            | 49           | 16            | 96           |
|                              | CV<30%                | 50            | 90           | 18            | 133          |
|                              | CV % mean (min-max)   | 11% (2%- 65%) | 21% (2%-80%) | 8% (4%-28%)   | 15% (2%-80%) |
| Saliva :MeOH (1 :1)<br>(n=5) | Number of metabolites | 50            | 108          | 18            | 145          |
|                              | CV<5%                 | 22            | 19           | 0             | 39           |
|                              | CV<10%                | 38            | 36           | 0             | 69           |
|                              | CV<20%                | 47            | 68           | 14            | 111          |
|                              | CV<30%                | 49            | 89           | 16            | 133          |
|                              | CV % mean (min-max)   | 8% (1%- 50%)  | 19% (0%-93%) | 22% (16%-52%) | 15% (0%-93%) |

Table S8: Number of extracted metabolites and coefficient of validation in saliva for the different extraction methods in <sup>1</sup>H-NMR and UHPLC-MS

| Pathway name                                | ACN 1:2    |                      | ACN 1:1    |                      | MeOH 1:2   |                      | MeOH 1:1   |                      |
|---------------------------------------------|------------|----------------------|------------|----------------------|------------|----------------------|------------|----------------------|
|                                             | Hits       | <i>p</i> -value      |
| Purine metabolism                           | 14         | 1.98 E <sup>-5</sup> | 12         | 3.57 E <sup>-4</sup> | 14         | 1.98 E <sup>-5</sup> | 13         | 9.41 E <sup>-5</sup> |
| Phenylalanine metabolism                    | 5          | 1.62 E <sup>-4</sup> | 5          | 1.53 E <sup>-4</sup> | 5          | 1.62 E <sup>-4</sup> | 4          | 2.19 E <sup>-3</sup> |
| Pyrimidine metabolism                       | 9          | 4.40 E <sup>-4</sup> | 11         | 9.78 E <sup>-6</sup> | 10         | 7.72 E <sup>-5</sup> | 10         | 7.20 E <sup>-5</sup> |
| Histidine metabolism                        | 5          | 2.09 E <sup>-3</sup> | /          | /                    | 6          | 2.33 E <sup>-4</sup> | 5          | 2.09 E <sup>-3</sup> |
| Pantothenate and CoA biosynthesis           | 5          | 2.81 E <sup>-3</sup> | 5          | 2.66 E <sup>-3</sup> | 5          | 2.81 E <sup>-3</sup> | 5          | 2.81 E <sup>-3</sup> |
| Glutathione metabolism                      | 5          | 4.79 E <sup>-3</sup> | /          | /                    | 7          | 7.64 E <sup>-5</sup> | 6          | 6.79 E <sup>-4</sup> |
| Alanine, aspartate and glutamate metabolism | 6          | 5.99 E <sup>-3</sup> | 7          | 1.05 E <sup>-3</sup> | 6          | 5.99 E <sup>-3</sup> | 7          | 1.13 E <sup>-3</sup> |
| Glyoxylate and dicarboxylate metabolism     | 6          | 1.01 E <sup>-2</sup> | 7          | 2.01 E <sup>-3</sup> | 7          | 2.16 E <sup>-3</sup> | 8          | 3.87 E <sup>-4</sup> |
| Glycerophospholipid metabolism              | /          | /                    | 4          | 6.17 E <sup>-3</sup> | /          | /                    | /          | /                    |
| Valine, leucine and isoleucine metabolism   | /          | /                    | 3          | 9.99 E <sup>-3</sup> | /          | /                    | /          | /                    |
| beta-Alanine metabolism                     | /          | /                    | /          | /                    | 5          | 7.59 E <sup>-3</sup> | /          | /                    |
| TOTAL                                       | 8 pathways |                      | 8 pathways |                      | 9 pathways |                      | 8 pathways |                      |

Table S9: Metabolite set coverage highlighted by metabolites extracted in saliva (CV<30%) according to the four sample preparations. The number of hits and the p-values are shown for each preparation by metabolite sets.

# FECES

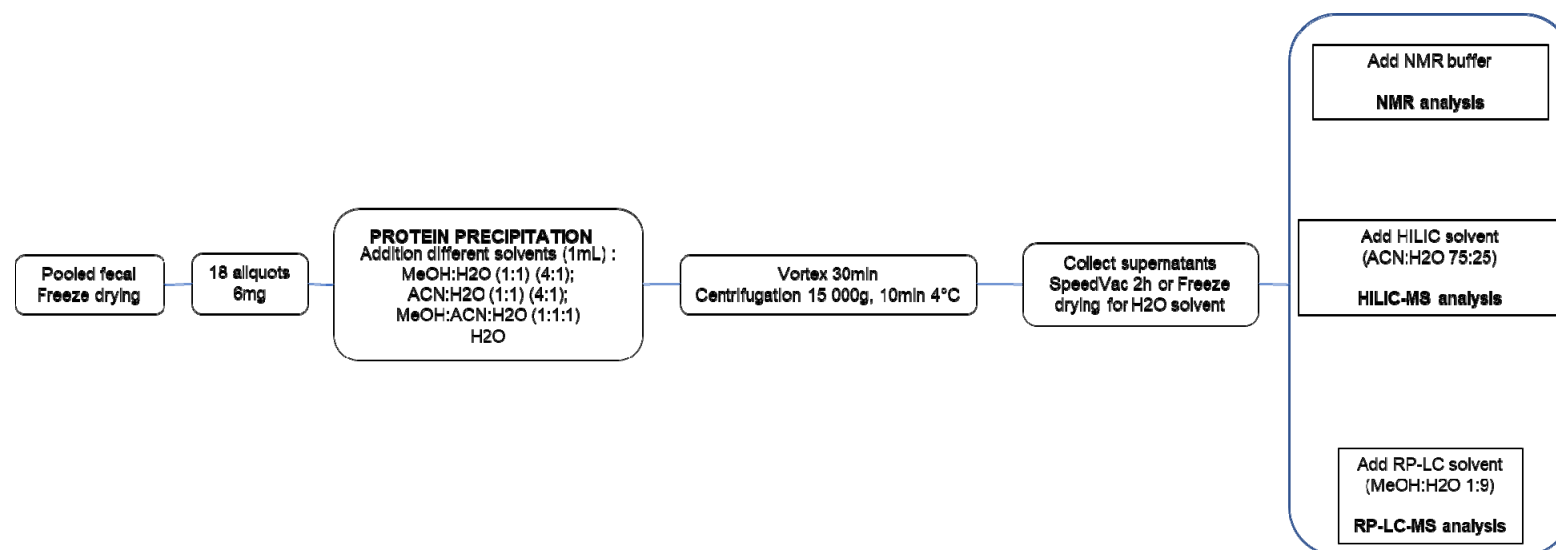

Figure S4: Schematic presentation of the sample preparation procedures applied in the pool of fecal samples for the selection of the optimum protocol for the maximum metabolome coverage by UHPLC-MS and  $^1\text{H}$ -NMR.

|                                                 | Numbers of buckets |           |           |           |     | CV – standard deviation |
|-------------------------------------------------|--------------------|-----------|-----------|-----------|-----|-------------------------|
|                                                 | RP-LC POS          | RP-LC NEG | HILIC POS | HILIC NEG | NMR |                         |
| ACN:H <sub>2</sub> O (1 :1)<br>(n=5)            | 2013               | 1963      | 1948      | 1251      | 45  | 12% - 5%                |
| ACN:H <sub>2</sub> O (4 :1)<br>(n=5)            | 1984               | 1931      | 1912      | 1261      | 45  | 10% - 5%                |
| MeOH:H <sub>2</sub> O (1:1)<br>(n=5)            | 1908               | 1961      | 1851      | 1259      | 45  | 9% - 4%                 |
| MeOH :H <sub>2</sub> O (4:1)<br>(n=5)           | 1991               | 1953      | 1865      | 1187      | 45  | 10% - 5%                |
| MeOH:H <sub>2</sub> O:ACN<br>(1 :1: 1)<br>(n=5) | 1827               | 1898      | 1863      | 1255      | 45  | 11% - 5%                |
| H <sub>2</sub> O<br>(n=5)                       | 1636               | 1737      | 1537      | 1043      | 45  | 12% - 6%                |

Table S10: Number of extracted buckets in feces for the different extraction methods in <sup>1</sup>H-NMR and UHPLC-MS

|                                              |                       | RP-LC         | HILIC         | NMR         | TOTAL         |
|----------------------------------------------|-----------------------|---------------|---------------|-------------|---------------|
| ACN:H <sub>2</sub> O (1 :1)<br>(n=5)         | Number of metabolites | 163           | 203           | 25          | 281           |
|                                              | CV<5%                 | 1             | 28            | 0           | 29            |
|                                              | CV<10%                | 49            | 119           | 23          | 161           |
|                                              | CV<20%                | 128           | 174           | 25          | 250           |
|                                              | <b>CV&lt;30%</b>      | <b>145</b>    | <b>192</b>    | <b>25</b>   | <b>266</b>    |
|                                              | CV % mean (min-max)   | 17% (1%-125%) | 12% (1%-74%)  | 7% (6%-11%) | 12% (1%-105%) |
| ACN:H <sub>2</sub> O (4 :1)<br>(n=5)         | Number of metabolites | 155           | 199           | 25          | 272           |
|                                              | CV<5%                 | 17            | 30            | 4           | 47            |
|                                              | CV<10%                | 90            | 118           | 22          | 181           |
|                                              | CV<20%                | 126           | 172           | 25          | 241           |
|                                              | <b>CV&lt;30%</b>      | <b>140</b>    | <b>189</b>    | <b>25</b>   | <b>259</b>    |
|                                              | CV % mean (min-max)   | 15% (2%-120%) | 11% (2%-78%)  | 6% (4%-12%) | 11% (2%-82%)  |
| MeOH:H <sub>2</sub> O (1:1)<br>(n=5)         | Number of metabolites | 155           | 201           | 25          | 278           |
|                                              | CV<5%                 | 26            | 41            | 0           | 63            |
|                                              | CV<10%                | 101           | 121           | 22          | 190           |
|                                              | CV<20%                | 129           | 171           | 25          | 242           |
|                                              | <b>CV&lt;30%</b>      | <b>143</b>    | <b>190</b>    | <b>25</b>   | <b>264</b>    |
|                                              | CV % mean (min-max)   | 13% (2%-130%) | 11% (2%-76%)  | 8% (5%-13%) | 10% (2%-130%) |
| MeOH :H <sub>2</sub> O (4:1)<br>(n=5)        | Number of metabolites | 156           | 196           | 25          | 270           |
|                                              | CV<5%                 | 62            | 24            | 9           | 79            |
|                                              | CV<10%                | 105           | 97            | 24          | 173           |
|                                              | CV<20%                | 136           | 166           | 25          | 246           |
|                                              | <b>CV&lt;30%</b>      | <b>143</b>    | <b>184</b>    | <b>25</b>   | <b>259</b>    |
|                                              | CV % mean (min-max)   | 11% (1%-148%) | 13% (2%-62%)  | 6% (3%-15%) | 10% (1%-62%)  |
| MeOH:H <sub>2</sub> O:ACN (1 :1: 1)<br>(n=5) | Number of metabolites | 160           | 195           | 25          | 275           |
|                                              | CV<5%                 | 19            | 35            | 8           | 55            |
|                                              | CV<10%                | 83            | 117           | 24          | 176           |
|                                              | CV<20%                | 127           | 160           | 25          | 236           |
|                                              | <b>CV&lt;30%</b>      | <b>141</b>    | <b>184</b>    | <b>25</b>   | <b>258</b>    |
|                                              | CV % mean (min-max)   | 17% (2%-144%) | 12% (2%-70%)  | 6% (3%-11%) | 12%(2%-144%)  |
| H <sub>2</sub> O<br>(n=5)                    | Number of metabolites | 152           | 195           | 25          | 269           |
|                                              | CV<5%                 | 27            | 9             | 4           | 36            |
|                                              | CV<10%                | 87            | 50            | 21          | 135           |
|                                              | CV<20%                | 131           | 127           | 25          | 218           |
|                                              | <b>CV&lt;30%</b>      | <b>140</b>    | <b>173</b>    | <b>25</b>   | <b>254</b>    |
|                                              | CV % mean (min-max)   | 12% (2%-65%)  | 18% (2%-111%) | 7% (4%-15%) | 13%(2%-69%)   |

Table S11: Number of extracted metabolites and coefficient of validation in feces for the different extraction methods in <sup>1</sup>H-NMR and UHPLC-MS



| Name                                                 | ACN:H2O 1:1 |                      | ACN:H2O 4:1 |                      | MeOH:H2O 1:1 |                      | MeOH:H2O 4:1 |                      | MeOH:H2O:ACN 1:1:1 |                      | H2O         |                      |
|------------------------------------------------------|-------------|----------------------|-------------|----------------------|--------------|----------------------|--------------|----------------------|--------------------|----------------------|-------------|----------------------|
|                                                      | Hits        | <i>p</i> -value      | Hits        | <i>p</i> -value      | Hits         | <i>p</i> -value      | Hits         | <i>p</i> -value      | Hits               | <i>p</i> -value      | Hits        | <i>p</i> -value      |
| Histidine metabolism                                 | 8           | 8.17 E <sup>-5</sup> | 9           | 9.02 E <sup>-6</sup> | 8            | 7.35 E <sup>-5</sup> | 9            | 6.64 E <sup>-6</sup> | 7                  | 4.78 E <sup>-4</sup> | 8           | 5.91 E <sup>-5</sup> |
| Tyrosine metabolism                                  | 12          | 8.52 E <sup>-4</sup> | 14          | 5.54 E <sup>-5</sup> | 13           | 1.82 E <sup>-4</sup> | 15           | 7.08 E <sup>-6</sup> | 12                 | 5.27 E <sup>-4</sup> | 13          | 1.33 E <sup>-4</sup> |
| Pyrimidine metabolism                                | 13          | 8.95 E <sup>-5</sup> | 13          | 1.04 E <sup>-4</sup> | 13           | 7.66 E <sup>-5</sup> | 13           | 7.08 E <sup>-5</sup> | 14                 | 9.60 E <sup>-6</sup> | 13          | 5.57 E <sup>-5</sup> |
| Phenylalanine metabolism                             | 6           | 1.89 E <sup>-4</sup> | 5           | 2.18 E <sup>-3</sup> | 5            | 1.91 E <sup>-3</sup> | 6            | 1.67 E <sup>-4</sup> | 5                  | 1.61 E <sup>-3</sup> | 5           | 1.67 E <sup>-3</sup> |
| Valine, leucine and isoleucine metabolism            | 6           | 3.03 E <sup>-5</sup> | 5           | 5.79 E <sup>-4</sup> | 6            | 2.78 E <sup>-5</sup> | 5            | 4.88 E <sup>-4</sup> | 6                  | 2.23 E <sup>-5</sup> | 6           | 2.33 E <sup>-5</sup> |
| Arginine and proline metabolism                      | 11          | 9.80 E <sup>-4</sup> | 11          | 1.11 E <sup>-3</sup> | 11           | 8.65 E <sup>-4</sup> | 11           | 8.12 E <sup>-4</sup> | 11                 | 6.26 E <sup>-4</sup> | 11          | 6.69 E <sup>-4</sup> |
| Alanine, aspartate and glutamate metabolism          | 9           | 1.57 E <sup>-3</sup> | 9           | 1.74 E <sup>-3</sup> | 9            | 1.41 E <sup>-3</sup> | 9            | 1.34 E <sup>-3</sup> | 9                  | 1.07 E <sup>-3</sup> | 9           | 1.14 E <sup>-3</sup> |
| Tryptophan metabolism                                | 12          | 6.69 E <sup>-4</sup> | 12          | 7.64 E <sup>-4</sup> | 12           | 5.84 E <sup>-4</sup> | 11           | 2.08 E <sup>-3</sup> | 11                 | 1.62 E <sup>-3</sup> | 12          | 4.42 E <sup>-4</sup> |
| Beta-Alanine metabolism                              | 7           | 4.23 E <sup>-3</sup> | 7           | 4.59 E <sup>-3</sup> | 7            | 3.90 E <sup>-3</sup> | 7            | 3.74 E <sup>-3</sup> | /                  | /                    | 7           | 3.28 E <sup>-3</sup> |
| Phenylalanine, tyrosine and tryptophane biosynthesis | /           | /                    | 3           | 4.51 E <sup>-3</sup> | /            | /                    | 3            | 4.06 E <sup>-3</sup> | /                  | /                    | /           | /                    |
| Pantothenate and CoA biosynthesis                    | 6           | 5.91 E <sup>-3</sup> | 6           | 6.35 E <sup>-3</sup> | 6            | 5.55 E <sup>-3</sup> | 6            | 5.30 E <sup>-3</sup> | 6                  | 4.56 E <sup>-3</sup> | 6           | 4.74 E <sup>-3</sup> |
| Glutathione metabolism                               | /           | /                    | /           | /                    | /            | /                    | 6            | 9.75 E <sup>-3</sup> | 6                  | 8.43 E <sup>-3</sup> | 6           | 8.75 E <sup>-3</sup> |
| Purine metabolism                                    | 14          | 6.11 E <sup>-3</sup> | /           | /                    | /            | /                    | /            | /                    | 14                 | 3.78 E <sup>-3</sup> | /           | /                    |
| Lysine degradation                                   |             |                      |             |                      |              |                      |              |                      |                    |                      | 6           | 8.75 E <sup>-3</sup> |
| TOTAL                                                | 11 pathways |                      | 11 pathways |                      | 10 pathways  |                      | 12 pathways  |                      | 11 pathways        |                      | 12 pathways |                      |

Table S12: Metabolite set coverage highlighted by metabolites extracted in feces (CV<30%) according to the six sample preparations. The number of hits and the p-values are shown for each preparation by metabolite sets.

# PLATFORM COMPLEMENTARITY

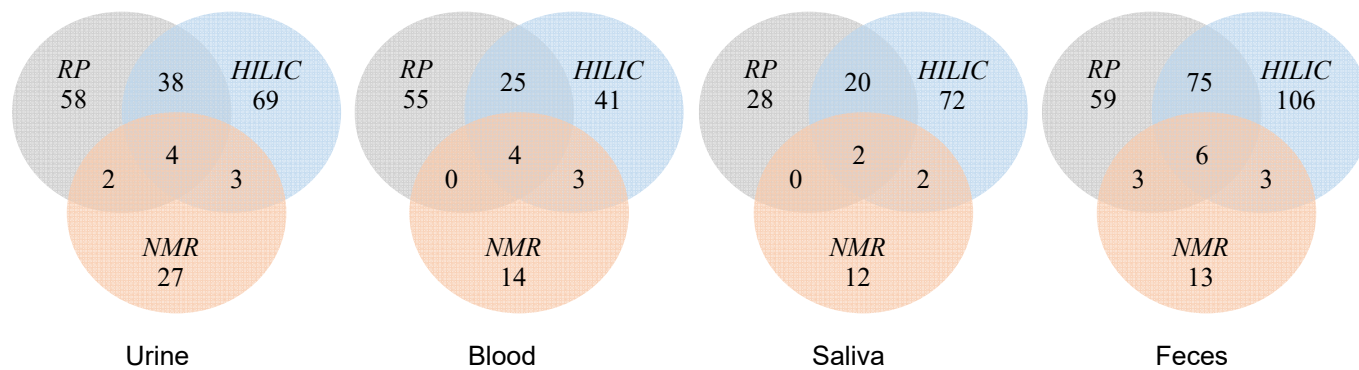

Figure S5: Venn diagram to mention the complementarity in term of metabolite coverage across the different analytical platforms according to the four matrices prepared with the chosen preparation

# MATRICES COMPLEMENTARITY

| Elements in FECES :                          |                            | Elements in URINE :          | Elements in SALIVA :              | Elements in BLOOD :   | Elements in FECES URINE :         | Elements in BLOOD FECES :       | Elements in FECES SALIVA : |
|----------------------------------------------|----------------------------|------------------------------|-----------------------------------|-----------------------|-----------------------------------|---------------------------------|----------------------------|
| 66 metabolites                               |                            | 25 metabolites               | 8 metabolites                     | 6 metabolites         | 31 metabolites                    | 12 metabolites                  | 7 metabolites              |
| Methylglutaric acid                          | Imidazoleacetic acid       | (2E,4E)-2,4-Hexadienoic acid | 2-Ketobutyric acid                | 1-Methylhistidine     | 1-Naphthylamine                   | 2-Hydroxy-3-methylbutyric acid  | 3-Hydroxyphenyllactate     |
| (+/-)-2-Hydroxy-4-(methylthio)butanoic acid  | Indole                     | 17 $\alpha$ -Estradiol       | 3-(3-Hydroxyphenyl)propanoic acid | 2-Hydroxybutyric acid | 2-Aminoisobutyric acid            | 3,4-Dihydroxybenzeneacetic acid | 3-Sulfinoolanine           |
| (R)-Salsolinol                               | Isovaleric acid            | 2-Methylglutaric acid        | 5-Methylcytosine                  | Dodecanoylcarnitine   | 3-(2-Hydroxyphenyl)propanoic acid | Glycocholic acid                | Cadaverine                 |
| 1-Aminocyclopropanecarboxylic acid           | Ketoleucine                | 5-Hydroxy-L-tryptophan       | Butanal                           | Propanal              | 3-Hydroxybenzoic acid             | Homogentisic acid               | Dethiobiotin               |
| 3-Amino-5-hydroxybenzoate                    | L-Acetylcarnitine          | 5'-Methylthioadenosine       | Deoxyadenosine                    | Theobromine           | 3-Methoxytyramine                 | L-Glutamine                     | D-Xylose                   |
| 3-Aminoisobutanoic acid                      | L-Asparagine               | Acetoin                      | D-Ribose 5-phosphate              | Thyroxine             | 3-Methyldioxyindole               | L-Kynurenine                    | Histamine                  |
| 4,5-Dihydroorotic acid                       | L-Dopa                     | Acetylcysteine               | Propionic acid                    |                       | 4-Hydroxybenzoic acid             | L-Proline                       | Malonate                   |
| 4-Guanidinobutanoic acid                     | Lithocholic acid           | Benzoic acid                 | Putrescine                        |                       | CMPcillatine                      | MG(18:1(9Z)/0:0/0:0)            |                            |
| 4-Hydroxycinnamic acid                       | L-Leucine                  | Cinnamaldehyde               |                                   |                       | Dimethylamine                     | Protocatechuic acid             |                            |
| 4-Methylcatechol                             | L-Lysine                   | Citraconic acid              |                                   |                       | Ethylmalonic acid                 | Ribitol                         |                            |
| 5-Aminopentanoic acid                        | Methylmalonic acid         | Citric acid                  |                                   |                       | Guanidoacetic acid                | Salicyluric acid                |                            |
| 5-Hydroxyindoleacetic acid                   | Mevalonolactone            | Cyclic GMP                   |                                   |                       | Homocysteine thiolactone          | Vanylglycol                     |                            |
| 6-Mercaptopurine ribonucleoside triphosphate | N-Acetyl-L-methionine      | Dimethylglycine              |                                   |                       | Homovanillic acid                 |                                 |                            |
| Adenosine monophosphate                      | N-Acetylputrescine         | Galactaric acid              |                                   |                       | L-Arginine                        |                                 |                            |
| Adipic acid                                  | N-Acetylserine             | Glycolate                    |                                   |                       | L-Glutamic acid                   |                                 |                            |
| Anserine                                     | N-alpha-Acetyl-L-lysine    | Hydroxyphenyllactic acid     |                                   |                       | L-Histidine                       |                                 |                            |
| Ascorbate                                    | Nicotine                   | Indoxyl sulfate              |                                   |                       | L-Histidinol                      |                                 |                            |
| Benzyl alcohol                               | Normetanephrine            | Itaconic acid                |                                   |                       | L-Serine                          |                                 |                            |
| Betaine                                      | Oleic acid                 | L-Arabinose                  |                                   |                       | Maleamate                         |                                 |                            |
| Butyric acid                                 | Ornithine                  | Maleic acid                  |                                   |                       | Melatonin                         |                                 |                            |
| Catechol                                     | Orotic acid                | Mannitol                     |                                   |                       | N-Acetylneuraminic acid           |                                 |                            |
| Citrulline                                   | Palmitic acid              | myo-Inositol                 |                                   |                       | N-Methyltryptamine                |                                 |                            |
| Cysteic acid                                 | Phenylethylamine           | Nicotinamide ribotide        |                                   |                       | O-Succinyl-L-homoserine           |                                 |                            |
| Deoxycholic acid                             | Phosphorylcholine          | Ophthalmic acid              |                                   |                       | Phenylacetaldehyde                |                                 |                            |
| Deoxycytidine                                | p-Hydroxyphenylacetic acid | Tryptophanol                 |                                   |                       | Pterin                            |                                 |                            |
| Diaminopimelic acid                          | p-Octopamine               |                              |                                   |                       | Pyrrole-2-carboxylic acid         |                                 |                            |
| Diethyl oxalpropionate                       | Purine                     |                              |                                   |                       | Shikimic acid                     |                                 |                            |
| D-Ribose                                     | Pyridoxamine               |                              |                                   |                       | Trigonelline                      |                                 |                            |
| Fumaric acid                                 | Sarcosine                  |                              |                                   |                       | Ureidopropionic acid              |                                 |                            |
| Gentisic acid                                | Tartaric acid              |                              |                                   |                       | Valeric acid                      |                                 |                            |
| Heptanoic acid                               | Thiamine                   |                              |                                   |                       | Xanthurenic acid                  |                                 |                            |
| Hydroquinone                                 | trans-Aconitic acid        |                              |                                   |                       |                                   |                                 |                            |
| Hydroxykynurenine                            | Tryptamine                 |                              |                                   |                       |                                   |                                 |                            |
|                                              |                            |                              |                                   |                       |                                   |                                 |                            |
|                                              |                            |                              |                                   |                       |                                   |                                 |                            |
|                                              |                            |                              |                                   |                       |                                   |                                 |                            |
|                                              |                            |                              |                                   |                       |                                   |                                 |                            |

| Elements in BLOOD URINE : | Elements in BLOOD SALIVA : | Elements in SALIVA URINE : | Elements in BLOOD FECES URINE : | Elements in FECES SALIVA URINE : | Elements in BLOOD FECES SALIVA : | Elements in BLOOD SALIVA URINE : | Elements in BLOOD FECES SALIVA URINE : |
|---------------------------|----------------------------|----------------------------|---------------------------------|----------------------------------|----------------------------------|----------------------------------|----------------------------------------|
| <b>6 metabolites</b>      | <b>2 metabolites</b>       | <b>2 metabolites</b>       | <b>26 metabolites</b>           | <b>19 metabolites</b>            | <b>10 metabolites</b>            | <b>5 metabolites</b>             | <b>37 metabolites</b>                  |
| Creatine                  | 2-Aminophenol              | AICAR                      | 4-Acetamidobutanoic acid        | 1H-Indole-3-acetamide            | 3-Hydroxycaproic acid            | Caffeine                         | 1-Methyladenosine                      |
| L-Malic acid              | Phenylacetic acid          | cis-Aconitic acid          | 4-Pyridoxic acid                | 3-Methyladenine                  | 3-Methoxytyrosine                | Choline                          | 2-Hydroxypyridine                      |
| Quinic acid               |                            |                            | 4-Trimethylammonibutanoic acid  | Acetic acid                      | Caffeate                         | Isocitric acid                   | 3-Hydroxyanthranilic acid              |
| S-Adenosylhomocysteine    |                            |                            | 6-Hydroxynicotinic acid         | Adenosine                        | Diethanolamine                   | N6-(delta2-Isopentenyl)-adenine  | 3-Hydroxybutyric acid                  |
| Sphinganine               |                            |                            | Acetoacetic acid                | Biotin                           | Leukotriene B4                   | N-Alpha-acetyllysine             | 3-Hydroxymethylglutaric acid           |
| Trimethylamine N-oxide    |                            |                            | All-trans-retinoic acid         | Cytidine                         | L-Valine                         |                                  | Acetylglutamine                        |
|                           |                            |                            | Azelaic acid                    | Deoxyuridine                     | Pectin                           |                                  | Adenine                                |
|                           |                            |                            | Cholic acid                     | Glycerophosphocholine            | Pipecolic acid                   |                                  | Cortisol                               |
|                           |                            |                            | Cortisone                       | Guanosine                        | Theophylline                     |                                  | Creatinine                             |
|                           |                            |                            | Diacetyl                        | Inosine                          | Trimethylamine                   |                                  | Cytosine                               |
|                           |                            |                            | Ethanolamine                    | L-Aspartic acid                  |                                  |                                  | D-Glucose                              |
|                           |                            |                            | Indole-3-methyl acetate         | N-Acetylglutamic acid            |                                  |                                  | Dihydrouracil                          |
|                           |                            |                            | Indoleacetaldehyde              | Nicotinic acid                   |                                  |                                  | Formic acid                            |
|                           |                            |                            | Kynurenic acid                  | Pimelic acid                     |                                  |                                  | Glycine                                |
|                           |                            |                            | L-Carnitine                     | Riboflavin                       |                                  |                                  | Guanine                                |
|                           |                            |                            | L-Lactic acid                   | Serotonin                        |                                  |                                  | Hippuric acid                          |
|                           |                            |                            | L-Threonine                     | Suberic acid                     |                                  |                                  | Hypoxanthine                           |
|                           |                            |                            | L-Tryptophan                    | Thymidine                        |                                  |                                  | Indoleacetic acid                      |
|                           |                            |                            | Lumichrome                      | Thymine                          |                                  |                                  | L-Alanine                              |
|                           |                            |                            | Methylguanidine                 |                                  |                                  |                                  | L-Isoleucine                           |
|                           |                            |                            | N-Acetyl-L-aspartic acid        |                                  |                                  |                                  | L-Methionine                           |
|                           |                            |                            | N-acetyltryptophan              |                                  |                                  |                                  | L-Phenylalanine                        |
|                           |                            |                            | Niacinamide                     |                                  |                                  |                                  | L-Tyrosine                             |
|                           |                            |                            | Quinaldic acid                  |                                  |                                  |                                  | Methyl jasmonate                       |
|                           |                            |                            | Taurine                         |                                  |                                  |                                  | N-Acetyl-L-alanine                     |
|                           |                            |                            | Uric acid                       |                                  |                                  |                                  | N-Acetylglutamine                      |
|                           |                            |                            |                                 |                                  |                                  |                                  | N-Acetyl-L-phenylalanine               |
|                           |                            |                            |                                 |                                  |                                  |                                  | N-Acetylserotonin                      |
|                           |                            |                            |                                 |                                  |                                  |                                  | Pantothenic acid                       |
|                           |                            |                            |                                 |                                  |                                  |                                  | Pyroglutamic acid                      |
|                           |                            |                            |                                 |                                  |                                  |                                  | Succinic acid                          |
|                           |                            |                            |                                 |                                  |                                  |                                  | trans-Ferulic acid                     |
|                           |                            |                            |                                 |                                  |                                  |                                  | Uracil                                 |
|                           |                            |                            |                                 |                                  |                                  |                                  | Uridine                                |
|                           |                            |                            |                                 |                                  |                                  |                                  | Urocanic acid                          |
|                           |                            |                            |                                 |                                  |                                  |                                  | Xanthine                               |
|                           |                            |                            |                                 |                                  |                                  |                                  | Xanthosine                             |

Table S13: Metabolites list link to the Upsetplot
